# Supplementary material for: Association between Ambient Particulate Air Pollution and Soluble Biomarkers of Endothelial Function: A Meta-Analysis
Source: MDPI journal article supplement (doi:10.3390/toxics12010076), 2024-01-15
Supplement: s1 [file s1]

## **Supplementary Materials**

### **Association between Ambient Particulate Air Pollution and Soluble Biomarkers of Endothelial Function: A Meta-Analysis**

Kai Wang, Lei Lei, Ge Li, Yang Lan, Wanzhou Wang, Jiaqi Zhu, Qisijing Liu, Lihua Ren, Shaowei Wu

#### **Table of contents**

**Table S1.** Detailed search strategy of the meta-analysis.

**Table S2.** Explanatory file for Effective Public Health Practice Project (EPHPP) Quality Assessment tool.

**Table S3.** Quality assessment using the Effective Public Health Practice Project (EPHPP) Quality Assessment tool for the included studies.

**Table S4.** Results of sensitivity analyses omitting one study each at a time for the associations between short-term exposure to PM<sub>2.5</sub> and biomarkers of endothelial function.

**Table S5.** Publication bias of the included studies for the association between short-term exposure to PM<sub>2.5</sub> and biomarkers of endothelial function.

**Figure S1.** Funnel plot of publication bias for the association between short-term exposure to PM<sub>2.5</sub> and ICAM-1.

**Figure S2.** Funnel plot of publication bias for the association between short-term exposure to PM<sub>2.5</sub> and VCAM-1.

**Table S1.** Detailed search strategy of the meta-analysis.

| Database         | Keywords                                                                                                                                                                                                                                                                                                                                                                                                                                                                                                                                                                                                                                                                                                                                                                                                                                                                                                                                                                                                                                                                                                                                                                                                                                                                                                                                                                                                                                                                                                                                                                                                                                                                                                                                                                                                                                                                                                                                                                          |
|------------------|-----------------------------------------------------------------------------------------------------------------------------------------------------------------------------------------------------------------------------------------------------------------------------------------------------------------------------------------------------------------------------------------------------------------------------------------------------------------------------------------------------------------------------------------------------------------------------------------------------------------------------------------------------------------------------------------------------------------------------------------------------------------------------------------------------------------------------------------------------------------------------------------------------------------------------------------------------------------------------------------------------------------------------------------------------------------------------------------------------------------------------------------------------------------------------------------------------------------------------------------------------------------------------------------------------------------------------------------------------------------------------------------------------------------------------------------------------------------------------------------------------------------------------------------------------------------------------------------------------------------------------------------------------------------------------------------------------------------------------------------------------------------------------------------------------------------------------------------------------------------------------------------------------------------------------------------------------------------------------------|
| <b>1. Pubmed</b> | <p><b>#1</b> "air pollution"[MeSH Terms] OR ("air"[All Fields] AND "pollution"[All Fields]) OR "air pollution"[All Fields] OR "particulate matter" OR "air pollutants" OR "particles" OR "PM2.5" OR "PM10"</p> <p><b>#2</b> ("ET-1"[All Fields] AND ("endotheline"[All Fields] OR "endothelins"[MeSH Terms] OR "endothelins"[All Fields] OR "endothelin"[All Fields])) OR "endothelin 1"[All Fields] OR "endothelin 1"[All Fields] OR "endothelin 1"[All Fields] OR "EDN1"[All Fields] OR "endothelial function"[All Fields] OR "endothelial dysfunction"[All Fields]</p> <p><b>#3</b> "E-selectin" OR "e selectin"[MeSH Terms] OR "e selectin"[All Fields] OR "e selectin"[All Fields] OR "ELAM-1" OR "E-sel" OR "CD62E" OR "sE-selectin" OR "soluble E-selectin" OR "endothelial adhesion receptors"</p> <p><b>#4</b> "intercellular adhesion molecule 1"[MeSH Terms] OR ("intercellular"[All Fields] AND "adhesion"[All Fields] AND "molecule 1"[All Fields]) OR "intercellular adhesion molecule 1"[All Fields] OR "icam 1"[All Fields] OR "Icam-1" OR "Intercellular cell adhesion molecule-1" OR "CD54" OR "icam-1" OR "intercellular adhesion molecule-1" OR "intercellular cell adhesion molecule 1" OR "sICAM-1" OR "endothelial-leukocyte adhesion molecule-1" OR "soluble ICAM-1" OR "cellular adhesion molecules"</p> <p><b>#5</b> "vascular cell adhesion molecule 1"[MeSH Terms] OR ("vascular"[All Fields] AND "cell"[All Fields] AND "adhesion"[All Fields] AND "molecule 1"[All Fields]) OR "vascular cell adhesion molecule 1"[All Fields] OR "vascular cell adhesion molecule 1"[All Fields] OR "VCAM-1" OR "Vascular Cell Adhesion Molecule-1" OR "vascular cell adhesion molecule-1" OR "CD106" OR "Vascular cell adhesion molecule 1" OR "vascular cell adhesion molecule 1" OR "soluble vascular cell adhesion molecule-1" OR "sVCAM-1" OR "soluble VCAM-1" OR "L-VCAM-1" OR "cellular adhesion molecules"</p> <p><b>#1 AND (#2 OR #3 OR #4 OR #5)</b></p> |
| <b>2. Embase</b> | <p>('air pollution'/exp OR 'air pollution' OR 'particulate matter'/exp OR 'particulate matter' OR 'air pollutants'/exp OR 'air pollutants' OR 'particles' OR 'pm2.5'/exp OR 'pm2.5' OR 'pm10'/exp OR 'pm10') AND ('et-1' OR 'endotheline' OR 'endothelins'/exp OR 'endothelins' OR 'endothelin'/exp OR 'endothelin' OR 'endothelin 1'/exp OR 'endothelin 1' OR 'edn1' OR 'endothelial function' OR 'endothelial dysfunction'/exp OR 'endothelial dysfunction' OR 'e-selectin'/exp OR 'e-selectin' OR 'e selectin'/exp OR 'e selectin' OR 'elam-1'/exp OR 'elam-1' OR 'e-sel' OR 'cd62e' OR 'se-selectin' OR 'soluble e-selectin' OR 'endothelial adhesion receptors' OR 'intercellular adhesion molecule 1'/exp OR 'intercellular adhesion molecule 1' OR 'icam 1'/exp OR 'icam 1' OR 'intercellular cell adhesion molecule-1' OR 'cd54' OR 'icam-1'/exp OR 'icam-1' OR 'intercellular adhesion molecule-1'/exp OR 'intercellular adhesion molecule-1' OR 'intercellular cell adhesion molecule 1' OR 'sicam-1' OR 'endothelial-leukocyte adhesion molecule-1'/exp OR 'endothelial-leukocyte adhesion molecule-1' OR 'soluble icam-1' OR 'vcam-1'/exp OR 'vcam-1' OR 'vascular cell adhesion molecule-1'/exp OR 'vascular cell adhesion molecule-1' OR 'cd106' OR 'vascular cell adhesion molecule 1'/exp OR 'vascular cell adhesion molecule 1' OR 'soluble vascular cell adhesion molecule-1' OR 'svcam-1' OR 'soluble vcam-1' OR 'l-vcam-1' OR 'cellular adhesion molecules')</p>                                                                                                                                                                                                                                                                                                                                                                                                                                                                                              |
| <b>3. Scopus</b> | <p>1 TITLE-ABS-KEY ( "air pollution" OR "particulate matter" OR "air pollutants" OR "particles" OR "pm2.5" OR "pm10" )</p> <p>2 TITLE-ABS-KEY ( "et-1" OR "endotheline" OR "endothelins" OR "endothelin" OR "endothelin 1" OR "edn1" OR "endothelial function" OR "endothelial dysfunction" )</p> <p>3 TITLE-ABS-KEY ( "e-selectin" OR "e selectin" OR "elam-1" OR "e-sel" OR "cd62e" OR "se-selectin" OR "soluble e-selectin" OR "endothelial adhesion receptors" )</p> <p>4 TITLE-ABS-KEY ( "intercellular adhesion molecule 1" OR "icam 1" OR "icam-1" OR "intercellular cell adhesion molecule-1" OR "cd54" OR "icam-1" OR "intercellular adhesion molecule-1" OR "sicam-1" OR "endothelial-leukocyte adhesion molecule-1" OR "soluble icam-1" OR "cellular adhesion molecules" )</p> <p>5 TITLE-ABS-KEY ( "vascular cell adhesion molecule 1" OR "vcam-1" OR "vascular</p>                                                                                                                                                                                                                                                                                                                                                                                                                                                                                                                                                                                                                                                                                                                                                                                                                                                                                                                                                                                                                                                                                                   |

cell adhesion molecule-1" OR "vascular cell adhesion molecule-1" OR "cd106" OR "vascular cell adhesion molecule 1" OR "vascular cell adhesion molecule 1" OR "soluble vascular cell adhesion molecule-1" OR "svcam-1" OR "soluble vcam-1" OR "l-vcam-1" OR "cellular adhesion molecules" )

1 AND (2 OR 3 OR 4 OR 5)

#### 4. Web of science

TS=("air pollution" OR "particulate matter" OR "air pollutants" OR "particles" OR "PM2.5" OR "PM10") AND (TS=("ET-1" OR "endotheline" OR "endothelins" OR "endothelin" OR "endothelin 1" OR "EDN1" OR "endothelial function" OR "endothelial dysfunction") OR TS=("E-selectin" OR "e selectin" OR "ELAM-1" OR "E-sel" OR "CD62E" OR "sE-selectin" OR "soluble E-selectin" OR "endothelial adhesion receptors" OR TS=("intercellular adhesion molecule 1" OR "icam 1" OR "Icam-1" OR "Intercellular cell adhesion molecule-1" OR "CD54" OR "icam-1" OR "intercellular adhesion molecule-1" OR "sICAM-1" OR "endothelial-leukocyte adhesion molecule-1" OR "soluble ICAM-1" OR "cellular adhesion molecules") OR TS=("vascular cell adhesion molecule 1" OR "VCAM-1" OR "Vascular Cell Adhesion Molecule-1 " OR "vascular cell adhesion molecule-1" OR "CD106" OR "Vascular cell adhesion molecule 1" OR "vascular cell adhesion molecule 1" OR "soluble vascular cell adhesion molecule-1" OR "sVCAM-1" OR "soluble VCAM-1" OR "L-VCAM-1" OR " cellular adhesion molecules"))

---

**Table S2.** Explanatory file for Effective Public Health Practice Project (EPHPP) Quality Assessment tool.

| <b>Component ratings</b>                                                                                                                                     | <b>Details</b>                                                                                                                                                                   |
|--------------------------------------------------------------------------------------------------------------------------------------------------------------|----------------------------------------------------------------------------------------------------------------------------------------------------------------------------------|
| <b>A. Selection bias</b>                                                                                                                                     | Good: (Q1 is 1) and (Q2 is 1).<br>Moderate: (Q1 is 1 or 2) and (Q2 is 2).<br>Poor: (Q1 is 3); or (Q2 is 3).                                                                      |
| <b>Q1. Are the individuals selected to participate in the study likely to be representative of the target population?</b>                                    |                                                                                                                                                                                  |
| 1 Very likely                                                                                                                                                | Randomly selected from a comprehensive list of individuals in the target population.                                                                                             |
| 2 Somewhat likely                                                                                                                                            | Referred from a source (e.g., clinic) in a systematic manner.                                                                                                                    |
| 3 Not likely                                                                                                                                                 | Self-referred.                                                                                                                                                                   |
| <b>Q2. What percentage of selected individuals agreed to participate?</b>                                                                                    |                                                                                                                                                                                  |
| 1 80 - 100% agreement                                                                                                                                        | Refers to the percentage of subjects in the control and intervention groups that agreed to participate in the study before they were assigned to intervention or control groups. |
| 2 60 – 79% agreement                                                                                                                                         |                                                                                                                                                                                  |
| 3 Less than 60% agreement                                                                                                                                    |                                                                                                                                                                                  |
| 4 Not applicable                                                                                                                                             |                                                                                                                                                                                  |
| <b>B. Study design</b>                                                                                                                                       | Good: (Q1 is 1).<br>Moderate: (Q1 is 2).<br>Weak: (Q1 is 3).                                                                                                                     |
| <b>Q1. Indicate the study design</b>                                                                                                                         |                                                                                                                                                                                  |
| 1 Strong design                                                                                                                                              | Randomized controlled trials (RCTs) and controlled clinical trials (CCTs).                                                                                                       |
| 2 Moderate design                                                                                                                                            | Cohort or case-crossover designs.                                                                                                                                                |
| 3 Weak design                                                                                                                                                | Cross-sectional or time-series designs.                                                                                                                                          |
| <b>C. Confounders</b>                                                                                                                                        | Good: (Q1 is 2) or (Q2 is 1).<br>Moderate: (Q1 is 1) and (Q2 is 2).<br>Poor: (Q1 is 1) and (Q2 is 3).                                                                            |
| <b>Q1. Were there important differences between groups prior to the intervention?</b>                                                                        |                                                                                                                                                                                  |
| 1 Yes                                                                                                                                                        | Important differences were found.                                                                                                                                                |
| 2 No                                                                                                                                                         | No important differences were found.                                                                                                                                             |
| <b>Q2. If yes, indicate the percentage of relevant confounders that were controlled (either in the design (e.g., stratification, matching) or analysis).</b> |                                                                                                                                                                                  |
| 1 80-100%                                                                                                                                                    | Cross-sectional and cohort: meteorological variables and demographic characteristics.<br>Case-crossover and time-series: meteorological variables and time-effects.              |
| 2 60-79%                                                                                                                                                     | Cross-sectional and cohort: meteorological variables or demographic characteristics.<br>Case-crossover and time-series: meteorological variables or time-effects.                |
| 3 Less than 60% or none                                                                                                                                      | Not controlled.                                                                                                                                                                  |
| <b>D. Blinding</b>                                                                                                                                           | Good: (Q1 is 2) and (Q2 is 2).<br>Moderate: (Q1 is 2) or (Q2 is 2).                                                                                                              |

Poor: (Q1 is 1) and (Q2 is 1).

**Q1. Was (were) the outcome assessor(s) aware of the intervention or exposure status of participants?**

- 1 Yes The outcome assessors were aware of the exposure status of participants.
- 2 No The outcome assessors were not aware of the exposure status of participants.

**Q2. Were the study participants aware of the research question?**

- 1 Yes The participants were aware of the exposure status of participants.
- 2 No The participants were not aware of the exposure status of participants.

**E. Data collection methods** Good: (Q1 is 1) and (Q2 is 1).  
Moderate: (Q1 is 1) and (Q2 is 2).  
Poor: (Q1 is 2).

**Q1. Were data collection tools shown to be valid?**

- 1 Yes The blood sample was detected by professionals and trained investigators.
- 2 No The method for blood sample assay was not introduced.

**Q2. Were data collection tools shown to be reliable?**

- 1 Yes Methods had been acknowledged or with evidence from previous researches.
- 2 No Methods were not clearly addressed.

**F. Withdrawals and drop-outs** Good: (Q1 is 1) and (Q2 is 1).  
Moderate: (Q2 is 2).  
Poor: (Q2 is 3) or (Q1 is 2).  
Not Applicable: (Q1 is 3) or (Q2 is 4).

**Q1. Were withdrawals and drop-outs reported in terms of numbers and/or reasons per group?**

- 1 Yes Describe both the numbers and reasons for withdrawals and drop-outs.
- 2 No Either the numbers or reasons for withdrawals and drop-outs are not reported.
- 3 Not Applicable No follow-up data.

**Q2. Indicate the percentage of participants completing the study. (If the percentage differs by groups, record the lowest).**

- 1 80 -100% The percentage of participants completing the study refers to the % of subjects remaining in the study at the final data collection period in all groups (i.e., control and intervention groups).
- 2 60 - 79%
- 3 Less than 60%
- 4 Not Applicable

**Overall ratings: 1) High**—no “Poor” ratings. **2) Moderate**—one “Poor” rating. **3) Poor**—two or more “Poor” ratings.

**Table S3.** Quality assessment using the Effective Public Health Practice Project (EPHPP) Quality Assessment tool for the included studies.

| Author                | Selection | Design   | Confounder | Blinding | Data | Withdraw | Overall  |
|-----------------------|-----------|----------|------------|----------|------|----------|----------|
| Chen et al. (2022)    | Moderate  | Moderate | High       | Poor     | High | High     | High     |
| Dai et al. (2016)     | Moderate  | Moderate | High       | High     | High | High     | High     |
| Feng et al. (2021)    | Moderate  | Moderate | High       | High     | High | High     | High     |
| Feng et al. (2021)    | Moderate  | Moderate | High       | High     | High | High     | High     |
| Finch et al. (2019)   | Moderate  | Moderate | High       | High     | High | Moderate | High     |
| Hajat et al. (2015)   | Moderate  | Moderate | High       | High     | High | Moderate | High     |
| Hu et al. (2021)      | Moderate  | Moderate | Moderate   | High     | High | High     | High     |
| Li et al. (2017)      | Moderate  | Moderate | High       | High     | High | High     | High     |
| Lin et al. (2019)     | Moderate  | High     | High       | High     | High | High     | High     |
| Liu et al. (2017)     | Moderate  | Moderate | High       | High     | High | High     | High     |
| Mozzoni et al. (2022) | Moderate  | Poor     | High       | High     | High | —        | Moderate |
| O'Neill et al. (2007) | Moderate  | Poor     | High       | High     | High | —        | Moderate |
| Riggs et al. (2020)   | Moderate  | Poor     | High       | High     | High | —        | Moderate |
| Tong et al. (2015)    | Moderate  | High     | High       | High     | High | High     | High     |
| Wang et al. (2015)    | Moderate  | Moderate | High       | High     | High | High     | High     |
| Wu et al. (2016)      | Moderate  | Moderate | High       | High     | High | High     | High     |
| Wyatt et al. (2020)   | Moderate  | Moderate | High       | High     | High | Poor     | Moderate |
| Zhang et al. (2020)   | Moderate  | Moderate | High       | High     | High | High     | High     |

**Table S4.** Results of sensitivity analyses omitting one study each at a time for the associations between short-term exposure to PM<sub>2.5</sub> and biomarkers of endothelial function.

| Outcome | Pollutant         | Study                                               | Pooled %-changes<br>(95%CI) | P-<br>value | I-<br>squared |
|---------|-------------------|-----------------------------------------------------|-----------------------------|-------------|---------------|
| ICAM-1  | PM <sub>2.5</sub> | Omitting Chen et al. (2022)                         | 1.62% (0.97%, 2.28%)        | <0.001      | 38.6%         |
| ICAM-1  | PM <sub>2.5</sub> | Omitting Dai et al. (2016)                          | 1.48% (0.79%, 2.16%)        | <0.001      | 45.0%         |
| ICAM-1  | PM <sub>2.5</sub> | Omitting Feng et al. (2021)                         | 1.66% (0.85%, 2.47%)        | <0.001      | 46.2%         |
| ICAM-1  | PM <sub>2.5</sub> | Omitting Hajat et al. (2015)                        | 1.68% (1.00%, 2.37%)        | <0.001      | 42.7%         |
| ICAM-1  | PM <sub>2.5</sub> | Omitting Hu et al. (2021)—Obese<br>subjects         | 1.57% (0.83%, 2.32%)        | <0.001      | 47.3%         |
| ICAM-1  | PM <sub>2.5</sub> | Omitting Hu et al. (2021)—Normal<br>weight subjects | 1.67% (0.92%, 2.44%)        | <0.001      | 45.5%         |
| ICAM-1  | PM <sub>2.5</sub> | Omitting Li et al. (2017)                           | 1.49% (0.85%, 2.13%)        | <0.001      | 38.9%         |
| ICAM-1  | PM <sub>2.5</sub> | Omitting Liu et al. (2017)                          | 1.30% (0.80%, 1.79%)        | <0.001      | 30.2%         |
| ICAM-1  | PM <sub>2.5</sub> | Omitting Mozzoni et al. (2022)                      | 1.57% (0.91%, 2.24%)        | <0.001      | 46.4%         |
| ICAM-1  | PM <sub>2.5</sub> | Omitting O'Neill et al. (2007)                      | 1.54% (0.88%, 2.20%)        | <0.001      | 46.9%         |
| ICAM-1  | PM <sub>2.5</sub> | Omitting Riggs et al. (2020)                        | 1.52% (0.87%, 2.18%)        | <0.001      | 37.5%         |
| ICAM-1  | PM <sub>2.5</sub> | Omitting Tong et al. (2015)                         | 1.63% (0.91%, 2.36%)        | <0.001      | 46.3%         |
| ICAM-1  | PM <sub>2.5</sub> | Omitting Wu et al. (2016)                           | 1.61% (0.89%, 2.33%)        | <0.001      | 46.9%         |
| ICAM-1  | PM <sub>2.5</sub> | Omitting Wyatt et al. (2020)                        | 1.32% (0.82%, 1.82%)        | <0.001      | 41.2%         |
| ICAM-1  | PM <sub>2.5</sub> | Omitting Zhang et al. (2020)                        | 1.50% (0.80%, 2.22%)        | <0.001      | 46.0%         |
| ICAM-1  | PM <sub>2.5</sub> | Pooled estimate                                     | 1.55% (0.89%, 2.22%)        | <0.001      | 43.3%         |
| —       | —                 | —                                                   | —                           | —           | —             |
| VCAM-1  | PM <sub>2.5</sub> | Omitting Chen et al. (2022)                         | 1.91% (0.80%, 3.03%)        | 0.001       | 88.4%         |
| VCAM-1  | PM <sub>2.5</sub> | Omitting Dai et al. (2016)                          | 1.93% (0.73%, 3.14%)        | 0.001       | 88.3%         |
| VCAM-1  | PM <sub>2.5</sub> | Omitting Feng et al. (2021)                         | 1.93% (0.64%, 3.24%)        | 0.003       | 79.6%         |
| VCAM-1  | PM <sub>2.5</sub> | Omitting Li et al. (2017)                           | 1.78% (0.73%, 2.83%)        | 0.001       | 87.7%         |
| VCAM-1  | PM <sub>2.5</sub> | Omitting Liu et al. (2017)                          | 1.60% (0.60%, 2.62%)        | 0.002       | 87.1%         |
| VCAM-1  | PM <sub>2.5</sub> | Omitting Mozzoni et al. (2022)                      | 2.09% (0.91%, 3.27%)        | <0.001      | 88.4%         |
| VCAM-1  | PM <sub>2.5</sub> | Omitting O'Neill et al. (2007)                      | 1.80% (0.75%, 2.87%)        | 0.001       | 87.6%         |
| VCAM-1  | PM <sub>2.5</sub> | Omitting Riggs et al. (2020)                        | 2.06% (0.95%, 3.18%)        | <0.001      | 87.8%         |
| VCAM-1  | PM <sub>2.5</sub> | Omitting Tong et al. (2015)                         | 2.15% (0.92%, 3.39%)        | 0.001       | 88.5%         |
| VCAM-1  | PM <sub>2.5</sub> | Omitting Wang et al. (2015)                         | 2.18% (0.89%, 3.50%)        | 0.001       | 88.5%         |
| VCAM-1  | PM <sub>2.5</sub> | Omitting Wu et al. (2016)                           | 2.25% (1.29%, 3.21%)        | <0.001      | 70.9%         |
| VCAM-1  | PM <sub>2.5</sub> | Omitting Wyatt et al. (2020)                        | 2.07% (0.77%, 3.39%)        | 0.002       | 88.4%         |
| VCAM-1  | PM <sub>2.5</sub> | Omitting Zhang et al. (2020)                        | 1.93% (0.74%, 3.13%)        | 0.001       | 88.3%         |
| VCAM-1  | PM <sub>2.5</sub> | Pooled estimate                                     | 1.97% (0.86%, 3.08%)        | <0.001      | 87.4%         |
| —       | —                 | —                                                   | —                           | —           | —             |
| ET-1    | PM <sub>2.5</sub> | Omitting Feng et al. (2021)                         | -0.12% (-7.20%, 7.49%)      | 0.974       | 83.4%         |
| ET-1    | PM <sub>2.5</sub> | Omitting Finch et al. (2019)                        | 1.42% (0.53%, 2.31%)        | 0.002       | 70.3%         |
| ET-1    | PM <sub>2.5</sub> | Omitting Lin et al. (2019)                          | -0.83% (-5.67%, 4.27%)      | 0.746       | 84.5%         |
| ET-1    | PM <sub>2.5</sub> | Omitting Tong et al. (2015)                         | -0.09% (-7.17%, 7.54%)      | 0.981       | 85.5%         |
| ET-1    | PM <sub>2.5</sub> | Omitting Wang et al. (2015)                         | -0.19% (-7.21%, 7.37%)      | 0.960       | 84.9%         |

|            |                   |                              |                        |       |        |
|------------|-------------------|------------------------------|------------------------|-------|--------|
| ET-1       | PM <sub>2.5</sub> | Omitting Wu et al. (2016)    | 0.20% (-6.99%, 7.96%)  | 0.957 | 80.0%  |
| ET-1       | PM <sub>2.5</sub> | Pooled estimate              | 0.22% (-4.94%, 5.65%)  | 0.936 | 82.70% |
| —          | —                 | —                            | —                      | —     | —      |
| E-selectin | PM <sub>2.5</sub> | Omitting Hajat et al. (2015) | 3.98% (-2.61%, 11.01%) | 0.243 | 84.0%  |
| E-selectin | PM <sub>2.5</sub> | Omitting Lin et al. (2019)   | 1.30% (-1.87%, 4.58%)  | 0.425 | 54.8%  |
| E-selectin | PM <sub>2.5</sub> | Omitting Riggs et al. (2020) | 2.71% (-1.57%, 7.16%)  | 0.218 | 82.9%  |
| E-selectin | PM <sub>2.5</sub> | Omitting Wu et al. (2016)    | 4.87% ( 0.74%, 9.17%)  | 0.020 | 66.8%  |
| E-selectin | PM <sub>2.5</sub> | Pooled estimate              | 3.21% (-0.90%, 7.49%)  | 0.128 | 76.50% |
| —          | —                 | —                            | —                      | —     | —      |

---



**Table S5.** Publication bias of the included studies for the association between short-term exposure to PM<sub>2.5</sub> and biomarkers of endothelial function.

| <b>Outcome</b> | <b>No. of estimates</b> | <b>Begg's <i>P</i>-value</b> | <b>Egger's <i>P</i>-value</b> |
|----------------|-------------------------|------------------------------|-------------------------------|
| ICAM-1         | 15                      | 0.125                        | 0.213                         |
| VCAM-1         | 13                      | 1.00                         | 0.290                         |
| ET-1           | 6                       | —                            | —                             |
| E-selectin     | 4                       | —                            | —                             |

Note: Begg's test and Egger's tests were unable to be conducted for some associations due to the small numbers of studies included.

**Figure S1.** Funnel plot of publication bias for the association between short-term exposure to PM<sub>2.5</sub> and ICAM-1.

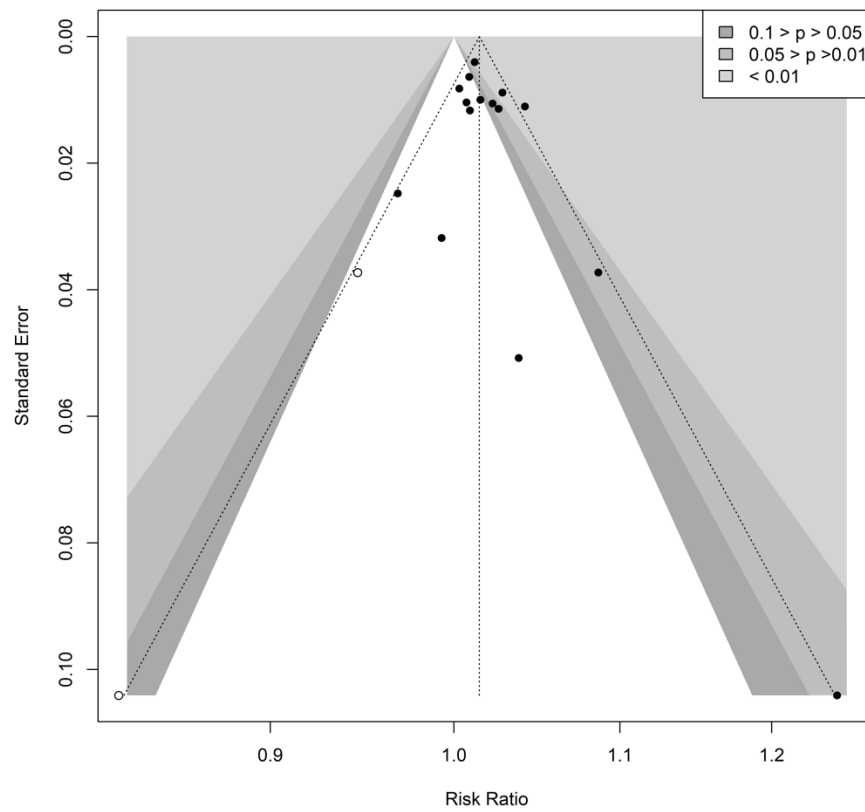

Note: Solid dots indicate the studies included in this meta-analysis, and hollow dots indicate missing literature added using the trim-and-fill method.

**Figure S2.** Funnel plot of publication bias for the association between short-term exposure to PM<sub>2.5</sub> and VCAM-1.

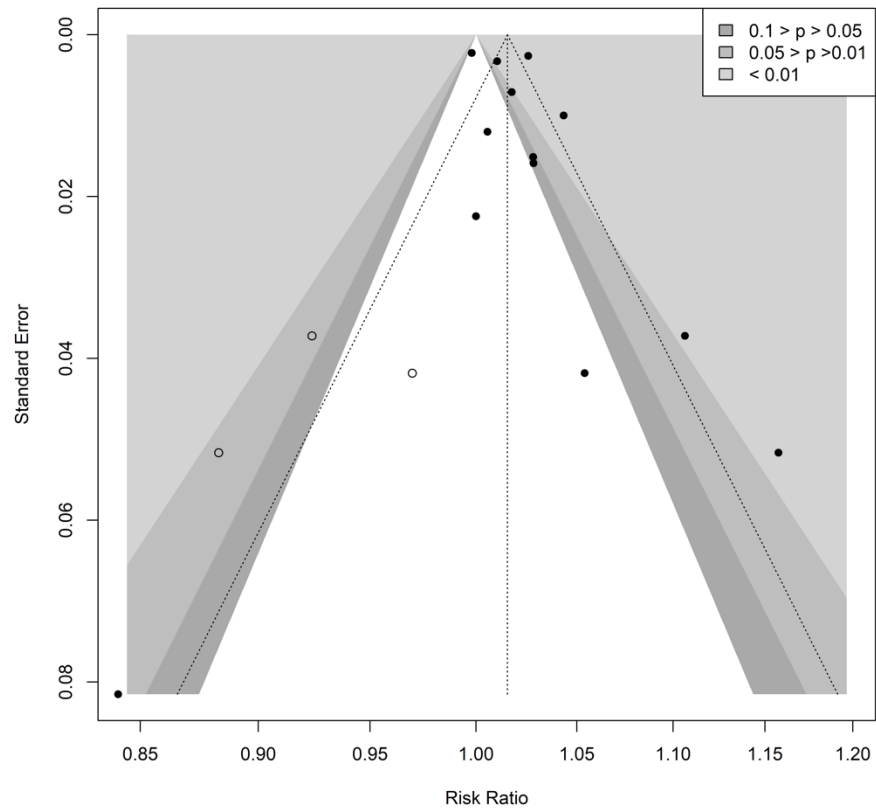

Note: Solid dots indicate the studies included in this meta-analysis, and hollow dots indicate missing literature added using the trim-and-fill method.
